# Supplementary material for: Gene Expression Profiling Identifies Microphthalmia-Associated Transcription Factor (MITF) and Dickkopf-1 (DKK1) as Regulators of Microenvironment-Driven Alterations in Melanoma Phenotype
Source: PubMed Central journal article supplement (PMC3986414; doi:10.1371/journal.pone.0095157), 2014-04-14
Supplement: pone.0095157.s001.pdf [file pone.0095157.s001.pdf]

**Table S1.** Primer sequences, forward (F) and reverse(R) used in the qRT-PCR study.

| Gene           | Sequence                     | T <sub>M</sub> (°C) | Amplicon (bp) |
|----------------|------------------------------|---------------------|---------------|
| <i>AXIN2</i>   | F: ATGATTCCATGTCCATGACG      | 56                  | 101           |
|                | R: CTCACACTGCGATGCATTT       | 56                  |               |
| <i>BCL2A1</i>  | F: GGATAAGGCAAAACGGAGGCTG    | 62                  | 183           |
|                | R: CAGTATTGCTTCAGGAGAGATAGC  | 59                  |               |
| <i>CCND1</i>   | F: CCCGCACGATTTTCATTGAAC     | 58                  | 134           |
|                | R: AGGGCGGATTGGAAATGAAC      | 58                  |               |
| <i>CTGF</i>    | F: CGACTGGAAGACACGTTTGG      | 60                  | 249           |
|                | R: AGGCTTGGAGATTTTGGGAG      | 58                  |               |
| <i>CTNNB1</i>  | F: TCTGAGGACAAGCCACAAGATTACA | 64                  | 122           |
|                | R: TGGGCACCAATATCAAGTCCAA    | 60                  |               |
| <i>DCT</i>     | F: CTCAGACCAACTTGGCTACAGC    | 64                  | 113           |
|                | R: CAACCAAAGCCACCAGTGTTC     | 64                  |               |
| <i>DKK1</i>    | F: CTCGGTTCTCAATTCCAACG      | 58                  | 172           |
|                | R: GCACTCCTCGTCTCTG          | 57                  |               |
| <i>FZD7</i>    | F: CAACGGCCTGATGTACTTTAAGG   | 63                  | 121           |
|                | R: CATGTCCACCAGGTAGGTGAGA    | 64                  |               |
| <i>FZD9</i>    | F: TTCTTCTCCACCGCCTTCAC      | 60                  | 396           |
|                | R: CAGGATGACGATGGTCTTGAG     | 61                  |               |
| <i>LBH</i>     | F: GGTTCACCACTATGGAGG        | 59                  | 183           |
|                | R: TCACTGCCCCGACTATCTG       | 59                  |               |
| <i>MITF-M</i>  | F: GCTGGAAATGCTAGAATACAG     | 57                  | 379           |
|                | R: TTCCAGGCTGATGATGTCATC     | 59                  |               |
| <i>MLANA</i>   | F: GGACAGCAAAGTGTCTCTTCAAG   | 63                  | 132           |
|                | R: TCAGGTGTCTCGCTGGCTCTTA    | 64                  |               |
| <i>PRDM1</i>   | F: CAGTTCCTAAGAACGCCAACAGG   | 62                  | 123           |
|                | R: GTGCTGGATTACATAGCGCATC    | 62                  |               |
| <i>RPS17</i>   | F: AATCTCCTGATCCAAGGCTG      | 60                  | 142           |
|                | R: CAAGATAGCAGGTTATGTCACG    | 58                  |               |
| <i>SLC45A2</i> | F: CTTTGCATCAGCCACCTCATTGG   | 65                  | 153           |
|                | R: TCCAACCTCGACTCCTCTTTCG    | 64                  |               |
| <i>TYR</i>     | F: CTGGAAGGATTTGCTAGTCCAC    | 62                  | 106           |
|                | R: CCTGTACCTGGGACATTGTTT     | 61                  |               |
| <i>TYRP1</i>   | F: GAAAAGAGCCACTTTGTCAGGG    | 62                  | 104           |
|                | R: CCATCTGGTCCCAGTATGTCT     | 61                  |               |
| <i>WNT10B</i>  | F: GAATGCGAATCCACAACAACAG    | 60                  | 196           |
|                | R: TTGCGGTTGTGGGTATCAATGAA   | 61                  |               |

**Table S2.** Genes up-regulated in melanospheres.

| Symbol   | Sequence code | FC     | Description                                                                       |
|----------|---------------|--------|-----------------------------------------------------------------------------------|
| TYR      | NM_000372     | 376.68 | tyrosinase (oculocutaneous albinism IA)                                           |
| MLANA    | NM_005511     | 376.38 | melan-A                                                                           |
| TYRP1    | NM_000550     | 194.94 | tyrosinase-related protein 1                                                      |
| PMEL     | NM_006928     | 190.05 | premelanosome protein, transcript variant 3                                       |
| NELL1    | NM_006157     | 62.43  | NEL-like 1 (chicken), transcript variant 1                                        |
| TRIM63   | NM_032588     | 54.27  | tripartite motif containing 63                                                    |
| NPTX1    | NM_002522     | 39.42  | neuronal pentraxin I                                                              |
| PNLIPRP3 | NM_001011709  | 39.28  | pancreatic lipase-related protein 3                                               |
| IFI27    | NM_005532     | 36.37  | interferon, alpha-inducible protein 27, transcript variant 2                      |
| HTN1     | NM_002159     | 35.34  | histatin 1                                                                        |
| VGF      | NM_003378     | 35.13  | VGF nerve growth factor inducible                                                 |
| SLC45A2  | NM_016180     | 32.61  | solute carrier family 45, member 2, transcript variant 1                          |
| DCT      | NM_001922     | 31.76  | dopachrome tautomerase (tyrosine-related protein 2), transcript variant 1         |
| FGFBP2   | NM_031950     | 29.45  | fibroblast growth factor binding protein 2                                        |
| SEMA5A   | NM_003966     | 28.21  | sema domain, seven thrombospondin repeats (type 1 and type 1-like)                |
| TF       | NM_001063     | 25.89  | transferrin (TF)                                                                  |
| GPNMB    | NM_001005340  | 25.75  | glycoprotein (transmembrane) nmb, transcript variant 1                            |
| SOD3     | NM_003102     | 23.80  | superoxide dismutase 3, extracellular                                             |
| D4S234E  | NM_014392     | 22.48  | DNA segment on chromosome 4 (unique) 234 expressed sequence, transcript variant 1 |
| CAPN3    | NM_000070     | 21.10  | calpain 3, (p94) (CAPN3), transcript variant 1                                    |
| BCL2A1   | NM_004049     | 21.09  | BCL2-related protein A1 (BCL2A1), transcript variant 1                            |
| RASD1    | NM_016084     | 20.97  | RAS, dexamethasone-induced 1, transcript variant 1                                |
| MGP      | NM_000900     | 20.44  | matrix Gla protein, transcript variant 2                                          |
| INSIG1   | NM_005542     | 19.94  | insulin induced gene 1, transcript variant                                        |
| MGP      | NM_001190839  | 19.04  | matrix Gla protein (MGP), transcript variant 1                                    |
| CCDC30   | NM_001080850  | 18.91  | coiled-coil domain containing 30                                                  |
| FABP7    | NM_001446     | 18.55  | fatty acid binding protein 7, brain                                               |
| RASEF    | NM_152573     | 18.22  | RAS and EF-hand domain containing                                                 |
| CRYAB    | NM_001885     | 17.22  | crystallin, alpha B                                                               |
| IRF4     | NM_002460     | 17.07  | interferon regulatory factor 4, transcript variant 1                              |
| IL33     | NM_033439     | 16.67  | interleukin 33, transcript variant 1                                              |
| CRTAC1   | NM_018058     | 16.25  | cartilage acidic protein 1, transcript variant 1                                  |
| LAMA1    | NM_005559     | 15.14  | laminin, alpha 1                                                                  |
| CCL18    | NM_002988     | 15.12  | chemokine (C-C motif) ligand 18 (pulmonary and activation-regulated)              |
| DNER     | NM_139072     | 14.80  | delta/notch-like EGF repeat containing                                            |
| NUPR1    | NM_001042483  | 14.68  | nuclear protein, transcriptional regulator 1, transcript variant 1                |
| PROS1    | NM_000313     | 14.01  | protein S (alpha)                                                                 |
| ITGB2    |               | 13.80  | integrin, beta 2 (complement component 3 receptor 3 and 4 subunit)                |
| TNFRSF14 | NM_003820     | 13.65  | tumor necrosis factor receptor superfamily, member 14                             |
| FAM134B  | NM_001034850  | 13.48  | family with sequence similarity 134, member B, transcript variant 1               |
| CKMT1A   | NM_001015001  | 13.43  | creatine kinase, mitochondrial 1A, nuclear gene encoding mitochondrial protein    |

|          |              |       |                                                                                       |
|----------|--------------|-------|---------------------------------------------------------------------------------------|
| NOX4     | NM_016931    | 13.24 | NADPH oxidase 4, transcript variant 1                                                 |
| CCKBR    | NM_176875    | 13.11 | cholecystokinin B receptor                                                            |
| CD36     | NM_001001547 | 12.61 | CD36 molecule (thrombospondin receptor), transcript variant 2                         |
| PI15     | NM_015886    | 12.47 | peptidase inhibitor 15                                                                |
| LY96     | NM_015364    | 12.46 | lymphocyte antigen 96, transcript variant 1                                           |
| VCX2     | NM_016378    | 12.28 | variable charge, X-linked 2                                                           |
| SLIT3    | NM_003062    | 11.73 | slit homolog 3 (Drosophila)                                                           |
| SPARCL1  | NM_004684    | 11.71 | SPARC-like 1 (hevin), transcript variant 2                                            |
| PCSK1    | NM_000439    | 11.60 | proprotein convertase subtilisin/kexin type 1, transcript variant 1                   |
| PLA2G2F  | NM_022819    | 11.34 | phospholipase A2, group IIF                                                           |
| SNAI2    | NM_003068    | 11.10 | snail homolog 2 (Drosophila)                                                          |
| SPP1     | NM_001040058 | 11.06 | secreted phosphoprotein 1, transcript variant 1                                       |
| SLC45A2  |              | 10.95 | solute carrier family 45, member 2                                                    |
| MSMO1    | NM_006745    | 10.81 | methylsterol monooxygenase 1, transcript variant 1                                    |
| PLA1A    | NM_015900    | 10.76 | phospholipase A1 member A, transcript variant 1                                       |
| ASPA     | NM_000049    | 10.58 | aspartoacylase (ASPA), transcript variant 1                                           |
| GPNMB    | BC011595,1   | 10.53 | glycoprotein (transmembrane) nmb, mRNA                                                |
| BIRC7    | NM_022161    | 10.50 | baculoviral IAP repeat containing 7, transcript variant 2                             |
| TRPM8    | NM_014227    | 10.30 | transient receptor potential cation channel, subfamily M, member 8                    |
| SLC5A4   |              | 10.22 | solute carrier family 5 (low affinity glucose transporter), member 4                  |
| FKBP11   | NM_016594    | 9.80  | FK506 binding protein 11, 19 kDa, transcript variant 1                                |
| QPCT     | NM_012413    | 9.64  | glutaminyl-peptide cyclotransferase                                                   |
| MITF     | NM_198159    | 9.63  | microphthalmia-associated transcription factor, transcript variant 1                  |
| P2RX7    | NM_002562    | 9.43  | purinergic receptor P2X, ligand-gated ion channel, 7, transcript variant 1            |
| PDK4     | NM_002612    | 9.38  | pyruvate dehydrogenase kinase, isozyme 4, nuclear gene encoding mitochondrial protein |
| IGLL1    | NM_020070    | 9.35  | immunoglobulin lambda-like polypeptide 1, transcript variant 1                        |
| SERPINF1 | NM_002615    | 9.27  | serpin peptidase inhibitor, clade F (pigment epithelium derived factor), member 1     |
| SLC13A3  | NM_001011554 | 9.01  | solute carrier family 13, member 3, transcript variant 2                              |
| MYB      | NM_005375    | 8.76  | v-myb myeloblastosis viral oncogene homolog (avian), transcript variant 2             |
| HRK      | NM_003806    | 8.75  | harakiri, BCL2 interacting protein (contains only BH3 domain)                         |
| FYB      | NM_001465    | 8.63  | FYN binding protein (FYB), transcript variant 1                                       |
| RAB3A    | NM_002866    | 8.62  | RAB3A, member RAS oncogene family                                                     |
| BGN      | NM_001711    | 8.57  | biglycan                                                                              |
| C1R      | NM_001733    | 8.55  | complement component 1, r subcomponent                                                |
| IL24     | NM_001185156 | 8.40  | interleukin 24, transcript variant 3                                                  |
| TKTL1    | NM_012253    | 8.34  | transketolase-like 1, transcript variant 1                                            |
| COLQ     | NM_080538    | 8.27  | collagen-like tail subunit of asymmetric acetylcholinesterase, transcript variant 2   |
| DMKN     | NM_001035516 | 8.26  | dermokine (DMKN), transcript variant 1                                                |

Only genes that showed FC values > 8 with *P* values < 0.05 are included.

**Table S3.** Genes up-regulated in monolayers.

| <b>Symbol</b> | <b>Sequence code</b> | <b>FC</b> | <b>Description</b>                                                                                        |
|---------------|----------------------|-----------|-----------------------------------------------------------------------------------------------------------|
| DKK1          | NM_012242            | 48.32     | dickkopf homolog 1 ( <i>Xenopus laevis</i> )                                                              |
| IGFBP5        | NM_000599            | 46.00     | insulin-like growth factor binding protein 5                                                              |
| ID3           | NM_002167            | 43.37     | inhibitor of DNA binding 3, dominant negative helix-loop-helix protein                                    |
| IL7R          | NM_002185            | 41.75     | interleukin 7 receptor                                                                                    |
| CYR61         | NM_001554            | 34.85     | cysteine-rich, angiogenic inducer, 61                                                                     |
| NUAK1         | NM_014840            | 34.49     | NUAK family, SNF1-like kinase, 1                                                                          |
| ID1           | NM_002165            | 29.99     | inhibitor of DNA binding 1, dominant negative helix-loop-helix protein, transcript variant 1              |
| IGF2BP1       | NM_006546            | 26.88     | insulin-like growth factor 2 mRNA binding protein 1 (IGF2BP1), transcript variant 1                       |
| LAPTM5        | NM_006762            | 26.70     | lysosomal protein transmembrane 5                                                                         |
| ANKRD1        | NM_014391            | 26.04     | ankyrin repeat domain 1 (cardiac muscle)                                                                  |
| STRA6         | NM_001199042         | 25.33     | stimulated by retinoic acid gene 6 homolog (mouse), transcript variant 8                                  |
| MDFI          | NM_005586            | 24.37     | MyoD family inhibitor                                                                                     |
| LIN28B        | NM_001004317         | 22.50     | lin-28 homolog B ( <i>C. elegans</i> )                                                                    |
| HMGA2         | NM_003483            | 19.66     | high mobility group AT-hook 2, transcript variant 1                                                       |
| TNFRSF11B     | NM_002546            | 19.43     | tumor necrosis factor receptor superfamily, member 11b                                                    |
| S100A4        | NM_002961            | 17.21     | S100 calcium binding protein A4 (S100A4), transcript variant 1                                            |
| KRT18         | NM_000224            | 16.43     | keratin 18 (KRT18), transcript variant 1                                                                  |
| KRT80         | NM_182507            | 16.38     | keratin 80 (KRT80), transcript variant 1                                                                  |
| ZFP42         | NM_174900            | 15.97     | zinc finger protein 42 homolog (mouse)                                                                    |
| VSTM1         | NM_198481            | 15.56     | V-set and transmembrane domain containing 1                                                               |
| CLDN4         | NM_001305            | 15.41     | claudin 4                                                                                                 |
| S100P         | NM_005980            | 15.17     | S100 calcium binding protein P                                                                            |
| PMEPA1        | NM_020182            | 15.15     | prostate transmembrane protein, androgen induced 1, transcript variant 1                                  |
| KRT86         | NM_002284            | 14.84     | keratin 86                                                                                                |
| NGFR          | NM_002507            | 14.77     | nerve growth factor receptor<br>branched chain amino-acid transaminase 1, cytosolic, transcript variant 1 |
| BCAT1         | NM_005504            | 14.76     | variant 1                                                                                                 |
| NRP1          | NM_003873            | 14.75     | neuropilin 1, transcript variant 1                                                                        |
| PLEK2         | NM_016445            | 14.72     | pleckstrin 2                                                                                              |
| CTGF          | NM_001901            | 14.51     | connective tissue growth factor                                                                           |
| TPM1          | NM_000366            | 14.20     | tropomyosin 1 (alpha), transcript variant 5                                                               |
| TPM1          | NM_001018005         | 12.90     | tropomyosin 1 (alpha), transcript variant 1                                                               |
| LCTL          | NM_207338            | 12.56     | lactase-like                                                                                              |
| SCHIP1        | NM_014575            | 12.54     | schwannomin interacting protein 1, transcript variant 1                                                   |
| EMP1          | NM_001423            | 12.53     | epithelial membrane protein 1                                                                             |
| THY1          | NM_006288            | 12.53     | Thy-1 cell surface antigen                                                                                |
| SLITRK6       | NM_032229            | 12.45     | SLIT and NTRK-like family, member 6                                                                       |
| TPM1          | NM_001018004         | 12.31     | tropomyosin 1 (alpha) (TPM1), transcript variant 3                                                        |
| SERPIND1      | NM_000185            | 11.96     | serpin peptidase inhibitor, clade D (heparin cofactor), member 1                                          |
| IL6           | NM_000600            | 11.81     | interleukin 6 (interferon, beta 2)                                                                        |
| ENC1          | NM_003633            | 11.27     | ectodermal-neural cortex 1 (with BTB-like domain)                                                         |

|             |              |       |                                                                                              |
|-------------|--------------|-------|----------------------------------------------------------------------------------------------|
| PPARG       | NM_138711    | 10.89 | peroxisome proliferator-activated receptor gamma, transcript variant 3                       |
| PRDM1       | NM_001198    | 10.86 | PR domain containing 1, with ZNF domain, transcript variant 1                                |
| CACNA2D4    | NM_172364    | 10.75 | calcium channel, voltage-dependent, alpha 2/delta subunit 4                                  |
| CD96        | NM_198196    | 10.34 | CD96 molecule, transcript variant 1                                                          |
| P2RY6       | NM_176798    | 10.15 | pyrimidinergic receptor P2Y, G-protein coupled, 6, transcript variant 2                      |
| SERPINB2    | NM_002575    | 10.07 | serpin peptidase inhibitor, clade B (ovalbumin), member 2, transcript variant 2              |
| S100A16     | NM_080388    | 9.67  | S100 calcium binding protein A16                                                             |
| STRA6       | NM_001142620 | 9.57  | stimulated by retinoic acid gene 6 homolog (mouse), transcript variant 5                     |
| PAPPA       | NM_002581    | 9.42  | pregnancy-associated plasma protein A, pappalysin 1                                          |
| TCF4        | NM_003199    | 8.84  | transcription factor 4, transcript variant 2                                                 |
| LY6K        | NM_017527    | 8.83  | lymphocyte antigen 6 complex, locus K, transcript variant 1                                  |
| ANGPT2      | NM_001147    | 8.70  | angiopoietin 2, transcript variant 1                                                         |
| SPOCD1      | NM_144569    | 8.63  | SPOC domain containing 1                                                                     |
| MMP9        | NM_004994    | 8.60  | matrix metalloproteinase 9 (gelatinase B, 92kDa gelatinase, 92kDa type IV collagenase)       |
| SLC16A3     | NM_001042422 | 8.53  | solute carrier family 16, member 3 (monocarboxylic acid transporter 4), transcript variant 2 |
| AMOTL2      | NM_016201    | 8.48  | angiomin like 2                                                                              |
| IQCJ-SCHIP1 | NM_001197113 | 8.48  | IQCJ-SCHIP1 readthrough, transcript variant 1                                                |
| IL37        | NM_014439    | 8.20  | interleukin 37 (IL37), transcript variant 1                                                  |

Only genes that showed FC > 8.0 with  $P < 0.05$  are included.

**Table S4**

**A.** The roles of Wnt pathway-related components linked to this pathway in GSEA.

The average fold change (FC) based on the microarray results for 3 patient-derived melanoma samples was determined for the gene expression in cells grown as monolayers in comparison with melanospheres.

| Gene                                 | FC    | Role in Wnt signaling pathway                                                                                                 | References |
|--------------------------------------|-------|-------------------------------------------------------------------------------------------------------------------------------|------------|
| <b>up-regulated in monolayers</b>    |       |                                                                                                                               |            |
| DKK1                                 | 48.32 | secreted inhibitor of canonical Wnt signaling pathway and its target gene                                                     | (1)        |
| WNT11                                | 5.98  | inhibitor of $\beta$ -catenin-dependent signaling<br>activator of non-canonical Wnt signaling pathway                         | (2,3)      |
| PLCB2                                | 4.92  | mediator of $\text{Ca}^{2+}$ -dependent Wnt signaling pathway                                                                 | (4)        |
| FZD8                                 | 4.52  | activator of canonical Wnt signaling pathway                                                                                  | (5)        |
| CCND1                                | 4.36  | target gene of canonical Wnt signaling pathway (cyclin D1)                                                                    | (6)        |
| RAC2                                 | 3.51  | mediator of PCP Wnt signaling pathway                                                                                         | (7)        |
| FOSL1                                | 3.41  | target gene of canonical Wnt signaling pathway                                                                                | (8)        |
| JUN                                  | 2.98  | target gene of canonical Wnt signaling pathway                                                                                | (8)        |
| PRICKLE1                             | 2.61  | inhibitor of canonical Wnt signaling pathway<br>component of PCP Wnt signaling pathway                                        | (10)       |
| WNT3                                 | 2.46  | activator of both canonical and non-canonical Wnt signaling pathways                                                          | (11,12)    |
| RUVBL1                               | 2.31  | interacts with $\beta$ -catenin to enhance $\beta$ -catenin-dependent gene expression                                         | (13)       |
| PLCB4                                | 2.11  | mediator of $\text{Ca}^{2+}$ -dependent Wnt signaling pathway                                                                 | (4)        |
| SEN2                                 | 1.99  | suppressor of canonical Wnt signaling pathway                                                                                 | (14)       |
| TCF7                                 | 1.79  | transcription factor regulating gene expression downstream of canonical Wnt signaling pathway                                 | (15)       |
| PPP2R5E                              | 1.78  | binds to Axin and inhibits $\beta$ -catenin-dependent activation of canonical Wnt signaling pathway                           | (16)       |
| NFATC3                               | 1.67  | transcription factor involved in $\text{Ca}^{2+}$ -dependent Wnt signaling pathway                                            | (17)       |
| TP53                                 | 1.63  | suppressor of canonical Wnt signaling pathway                                                                                 | (18)       |
| CACYBP                               | 1.52  | suppressor of canonical Wnt signaling pathway                                                                                 | (19)       |
| <b>up-regulated in melanospheres</b> |       |                                                                                                                               |            |
| DAAM2                                | 7.85  | enhancer of canonical Wnt signaling pathway                                                                                   | (20)       |
| FZD7                                 | 3.56  | activator of canonical Wnt signaling pathway and its target gene; contributes to self-renewal of human embryonic stem cells   | (21-23)    |
| FZD9                                 | 2.74  | activator of both canonical and non-canonical Wnt signaling pathways; a marker for human mesenchymal stem cells from placenta | (24-26)    |
| WNT10B                               | 2.09  | activator of canonical Wnt signaling pathway; stimulates anchorage-independent growth through non-canonical mechanisms        | (27,28)    |
| LRP6                                 | 1.90  | co-receptor in canonical Wnt signaling pathway activation, necessary for DKK1 inhibitory activity                             | (29)       |
| PLCB1                                | 1.75  | mediator of $\text{Ca}^{2+}$ -dependent Wnt signaling pathway                                                                 | (4)        |
| AXIN2                                | 1.57  | negative regulator of $\beta$ -catenin-dependent signaling and its target gene                                                | (11)       |

**B.** The roles of Wnt pathway-related components linked to this pathway based on literature search. The average fold change (FC) index bases on the microarray results for 3 patient-derived melanoma samples and was determined for the gene expression in monolayers in comparison with melanospheres.

| Gene                                 | FC    | Role in Wnt signaling pathway                                                                   | References |
|--------------------------------------|-------|-------------------------------------------------------------------------------------------------|------------|
| <b>up-regulated monolayers</b>       |       |                                                                                                 |            |
| CTGF                                 | 14.51 | target gene of canonical Wnt signaling pathway                                                  | (30)       |
| TCF4                                 | 8.84  | transcription factor regulating gene expression downstream of canonical Wnt signaling pathway   | (31)       |
| SHISA9 transcript variant 1          | 4.04  | prevents Wnt signaling pathway activation through blocking the maturation of Frizzled receptors | (32)       |
| SHISA9 transcript variant 2          | 6.74  |                                                                                                 |            |
| RSPO4                                | 2.23  | secreted molecule that interferes with DKK1 to activate canonical Wnt signaling pathway         | (33)       |
| <b>up-regulated in melanospheres</b> |       |                                                                                                 |            |
| MITF                                 | 9.63  | target gene of canonical Wnt signaling pathway                                                  | (34)       |
| T (Brachyury)                        | 5.92  | target gene of canonical Wnt signaling pathway                                                  | (35)       |
| SHISA2                               | 4.34  | prevents Wnt signaling pathway activation through blocking the maturation of Frizzled receptors | (32)       |
| VEGFA                                | 3.38  | target gene of canonical Wnt signaling pathway                                                  | (36)       |
| LBH                                  | 3.05  | target gene of canonical Wnt signaling pathway                                                  | (37)       |
| DAB2                                 | 2.16  | inhibitor of canonical Wnt signaling pathway through Lrp6-dependent mechanism                   | (38)       |
| TWIST1                               | 2.07  | target gene of canonical Wnt signaling pathway                                                  | (39)       |
| ABCB1 (MDR1)                         | 1.66  | target gene of canonical Wnt signaling pathway                                                  | (40)       |
| POU5F1 (OCT4)                        | 1.60  | target gene of canonical Wnt signaling pathway                                                  | (41)       |

#### References to Table S4

- Niida, A., Hiroko, T., Kasai, M., Furukawa, Y., Nakamura, Y., Suzuki, Y., 2004. DKK1, a negative regulator of Wnt signaling, is a target of the beta-catenin/TCF pathway. *Oncogene* 23, 8520-8526.
- Anton, R., Kestler, H.A., Kuhl, M., 2007. Beta-catenin signaling contributes to stemness and regulates early differentiation in murine embryonic stem cells. *FEBS Lett.* 581, 5247-5254.
- Toyama, T., Lee, H.C., Koga, H., Wands, J.R., Kim M., 2002. Noncanonical Wnt11 inhibits hepatocellular carcinoma cell proliferation and migration. *Mol. Cancer Res.* 8, 254-265.
- Huelsken J, Behrens J., 2002. The Wnt signalling pathway. *J. Cell Sci.* 115, 3977-3978.
- Nam, J.S., Turcotte, T.J., Smith, P.F., Choi, S., Yoon, J.K., 2006. Mouse cristin/R-spondin family proteins are novel ligands for the Frizzled 8 and LRP6 receptors and activate beta-catenin-dependent gene expression. *J. Biol. Chem.* 281, 13247-13257.
- Tetsu, O., McCormick, F., 1999. Beta-catenin regulates expression of cyclin D1 in colon carcinoma cells. *Nature* 398, 422-426.
- Schlessinger, K., Hall, A., Tolwinski, N., 2009. Wnt signaling pathways meet Rho GTPases. *Genes Dev.* 23, 265-277.
- Mann, B., Gelos, M., Siedow, A., Hanski, M.L., Gratchev, A., Ilyas, M., Bodmer, W.F., Moyer, M.P., Riecken, E.O., Buhr, H.J., Hanski, C., 1999. Target genes of beta-catenin-T cell-

- factor/lymphoid-enhancer-factor signaling in human colorectal carcinomas. *Proc. Natl. Acad. Sci. U. S. A.* 96, 1603-1608.
9. Tao, H., Suzuki, M., Kiyonari, H., Abe, T., Sasaoka, T., Ueno, N., 2009. Mouse *prickle1*, the homolog of a PCP gene, is essential for epiblast apical-basal polarity. *Proc. Natl. Acad. Sci. U. S. A.* 106,14426-14431.
  10. Chan, D.W., Chan, C.Y., Yam, J.W., Ching, Y.P., Ng, I.O., 2006. *Prickle-1* negatively regulates Wnt/beta-catenin pathway by promoting Dishevelled ubiquitination/degradation in liver cancer. *Gastroenterology* 131, 1218-1227.
  11. Wu, Y., Ginther, C., Kim, J., Mosher, N., Chung, S., Slamon, D., Vadgama, J.V., 2012. Expression of Wnt3 activates Wnt/beta-catenin pathway and promotes EMT-like phenotype in trastuzumab-resistant HER2-overexpressing breast cancer cells. *Mol. Cancer Res.* 10, 1597-1606.
  12. Kobune, M., Chiba, H., Kato, J., Kato, K., Nakamura, K., Kawano, Y., Takada, K., Takimoto, R., Takayama, T., Hamada, H., Niitsu, Y., 2007. Wnt3/RhoA/ROCK signaling pathway is involved in adhesion-mediated drug resistance of multiple myeloma in an autocrine mechanism. *Mol. Cancer Ther.* 6, 1774-1784.
  13. Bauer, A., Chauvet, S., Huber, O., Usseglio, F., Rothbacher, U., Aragnol, D., Kemler, R., Pradel, J., 2000. *Pontin52* and *reptin52* function as antagonistic regulators of beta-catenin signalling activity. *EMBO J.* 19, 6121-6130.
  14. Kadoya, T., Kishida, S., Fukui, A., Hinoi, T., Michiue, T., Asashima, M., Kikuchi, A., 2000. Inhibition of Wnt signaling pathway by a novel axin-binding protein. *J. Biol. Chem.* 275, 37030-37037.
  15. Janssens, S., Van Den Broek, O., Davenport, I.R., Akkers, R.C., Liu, F., Veenstra, G.J., Hoppler, S., Vleminckx, K., Destrée, O., 2013. The Wnt signaling mediator *tcf1* is required for expression of *foxd3* during *Xenopus* gastrulation. *Int. J. Dev. Biol.* 57, 49-54.
  16. Yamamoto, H., Hinoi, T., Michiue, T., Fukui, A., Usui, H., Janssens, V., Van Hoof, C., Goris, J., Asashima, M., Kikuchi, A., 2001. Inhibition of the Wnt signaling pathway by the PR61 subunit of protein phosphatase 2A. *J. Biol. Chem.* 20, 26875-26882.
  17. de Frutos, S., Spangler, R., Alo, D., Bosc, L.V., 2007. NFATc3 mediates chronic hypoxia-induced pulmonary arterial remodeling with alpha-actin up-regulation. *J. Biol. Chem.* 282, 15081-15089.
  18. Kim, N.H., Kim, H.S., Kim, N.G., Lee, I., Choi, H.S., Li, X.Y., Kang, S.E., Cha, S., Y., Ryu, J.K., Na, J.M., Park, C., Kim, K., Lee, S., Gumbiner, B.M., Yook, J.I., Weiss, S.J., 2011. p53 and microRNA-34 are suppressors of canonical Wnt signaling. *Sci. Signal.* 4, ra71.
  19. Filipek, A., 2006. S100A6 and CacyBP/SIP - two proteins discovered in ehrlich ascites tumor cells that are potentially involved in the degradation of beta-catenin. *Chemotherapy* 52, 32-34.
  20. Lee, H.K., Deneen, B., 2012. *Daam2* is required for dorsal patterning via modulation of canonical Wnt signaling in the developing spinal cord. *Dev. Cell* 22, 183-196.
  21. Nambotin, S.B., Lefrancois, L., Sainsily, X., Berthillon, P., Kim, M., Wands, J.R., Chevallier, M., Jalinot, P., Scoazec, J.Y., Trepo, C., Zoulim, F., Merle, P., 2011. Pharmacological inhibition of *Frizzled-7* displays anti-tumor properties in hepatocellular carcinoma. *J. Hepatol.* 54, 288-299.
  22. Melchior, K., Weiss, J., Zaehres, H., Kim, Y.M., Lutzko, C., Roosta, N., Hescheler, J., Muschen, M., 2008. The WNT receptor FZD7 contributes to self-renewal signaling of human embryonic stem cells. *Biol. Chem.* 389, 897-903.
  23. Vincan, E., Flanagan, D.J., Pouliot, N., Brabletz, T., Spaderna, S., 2010. Variable FZD7 expression in colorectal cancers indicates regulation by the tumour microenvironment. *Dev. Dyn.* 239, 311-317.
  24. Karasawa, T., Yokokura, H., Kitajewski, J., Lombroso, P.J., 2002. *Frizzled-9* is activated by Wnt-2 and functions in Wnt/beta-catenin signaling. *J. Biol. Chem.* 277, 37479-37486.
  25. Winn, R.A., Marek, L., Han, S.Y., Rodriguez, K., Rodriguez, N., Hammond, M., van Scoyk, M., Acosta, H., Mirus, J., Barry, N., Bren-Mattison, Y., van Raay, T.J., Nemenoff, R.A., Heasley, L.E., 2005. Restoration of Wnt-7a expression reverses non-small cell lung cancer cellular transformation through *frizzled-9*-mediated growth inhibition and promotion of cell differentiation. *J. Biol. Chem.* 280, 19625-19634.



26. Battula, V.L., Treml, S., Abele, H., Buhring, H.J., 2008. Prospective isolation and characterization of mesenchymal stem cells from human placenta using a frizzled-9-specific monoclonal antibody. *Differentiation* 76, 326-336.
27. Modder, U.I., Oursler, M.J., Khosla, S., Monroe, D.G., 2011. Wnt10b activates the Wnt, notch, and NFkappaB pathways in U2OS osteosarcoma cells. *J. Cell. Biochem.* 112, 1392-1402.
28. Yoshikawa, H., Matsubara, K., Zhou, X., Okamura, S., Kubo, T., Murase, Y., Shihachi, Y., Esteller, M., Herman, J.G., Wei Wang, X., Harris, C.C., 2007. WNT10B functional dualism: beta-catenin/Tcf-dependent growth promotion or independent suppression with deregulated expression in cancer. *Mol. Biol Cell* 18, 4292-4303.
29. Bafico, A., Liu, G., Yaniv, A., Gazit, A., Aaronson, S.A., 2001. Novel mechanism of Wnt signalling inhibition mediated by Dickkopf-1 interaction with LRP6/Arrow. *Nat. Cell Biol.* 3, 683-686.
30. Luo, Q., Kang, Q., Si, W., Jiang, W., Park, J.K., Peng, Y., Li, X., Luu, H.H., Luo, J., Montag, A.G., Haydon, R.C., He, T.C., 2004. Connective tissue growth factor (CTGF) is regulated by Wnt and bone morphogenetic proteins signaling in osteoblast differentiation of mesenchymal stem cells. *J. Biol. Chem.* 279, 55958-55968.
31. van de Wetering, M., Sancho, E., Verweij, C., de Lau W., Oving, I., Hurlstone, A., van der Horn, K., Battle, E., Coudreuse, D., Haramis, A.P., Tjon-Pon-Fong, M., Moerer, P., van den Born, M., Soete, G., Pals, S., Eilers, M., Medema, R., Clevers, H., 2002. The beta-catenin/TCF-4 complex imposes a crypt progenitor phenotype on colorectal cancer cells. *Cell* 111, 241-250.
32. Yamamoto, A., Nagano, T., Takehara, S., Hibi, M., Aizawa, S., 2005. Shisa promotes head formation through the inhibition of receptor protein maturation for the caudalizing factors, Wnt and FGF. *Cell* 120, 223-235.
33. Kim, K.A., Wagle, M., Tran, K., Zhan, X., Dixon, M.A., Liu, S., Gros, D., Korver, W., Yonkovich, S., Tomasevic, N., Binnerts, M., Abo, A., 2008. R-Spondin family members regulate the Wnt pathway by a common mechanism. *Mol. Biol Cell.* 19, 2588-2596.
34. Dorsky, R.I., Raible, D.W., Moon, R.T., 2000. Direct regulation of nacre, a zebrafish MITF homolog required for pigment cell formation, by the Wnt pathway. *Genes Dev.* 14, 158-162.
35. Arnold, S.J., Stappert, J., Bauer, A., Kispert, A., Herrmann, B.G., Kemler, R., 2000. Brachyury is a target gene of the Wnt/beta-catenin signaling pathway. *Mech. Dev.* 91, 249-258.
36. Zhang, X., Gaspard, J.P., Chung, D.C., 2001. Regulation of vascular endothelial growth factor by the Wnt and K-ras pathways in colonic neoplasia. *Cancer Res.* 61, 6050-6054.
37. Rieger, M.E., Sims, A.H., Coats, E.R., Clarke, R.B., Briegel, K.J., 2010. The embryonic transcription cofactor LBH is a direct target of the Wnt signaling pathway in epithelial development and in aggressive basal subtype breast cancers. *Mol. Cell Biol.* 30, 4267-4279.
38. Jiang, Y., He, X., Howe, P.H., 2012. Disabled-2 (Dab2) inhibits Wnt/beta-catenin signalling by binding LRP6 and promoting its internalization through clathrin. *EMBO J.* 31, 2336-2349.
39. Howe, L.R., Watanabe, O., Leonard, J., Brown, A.M., 2003. Twist is up-regulated in response to Wnt1 and inhibits mouse mammary cell differentiation. *Cancer Res.* 63, 1906-1913.
40. Correa, S., Binato, R., Du, R.B., Castelo-Branco, M.T., Pizzatti, L., Abdelhay, E., 2012. Wnt/beta-catenin pathway regulates ABCB1 transcription in chronic myeloid leukemia. *BMC Cancer* 12, 303.
41. Sato, N., Meijer, L., Skaltsounis, L., Greengard, P., Brivanlou, A.H., 2004. Maintenance of pluripotency in human and mouse embryonic stem cells through activation of Wnt signaling by a pharmacological GSK-3-specific inhibitor. *Nat. Med.* 10, 55-63.

**Table S5.** MITF target genes were strongly up-regulated in melanospheres.

| Symbol                                     | Sequence code | FC   | Description                                                               | References |
|--------------------------------------------|---------------|------|---------------------------------------------------------------------------|------------|
| <b>genes up-regulated in melanospheres</b> |               |      |                                                                           |            |
| ACP5                                       | NM_001611     | 3.8  | Acid phosphatase 5, tartrate resistant                                    | (1)        |
| ACSL1                                      | NM_001995     | 3.4  | Acyl-CoA synthetase long-chain 1                                          | (2)        |
| APOE                                       | NM_000041     | 3.7  | Apolipoprotein E                                                          | (2)        |
| ASAH1                                      | NM_177924     | 5.0  | N-acylsphingosine amidohydrolase 1                                        | (2)        |
| ATP1A1                                     | NM_000701     | 2.4  | ATPase, Na <sup>+</sup> /K <sup>+</sup> transporting, alpha 1 polypeptide | (2)        |
| BCL2                                       | NM_000657     | 1.7  | B-cell CLL / lymphoma 2                                                   | (3)        |
| BCL2A1                                     | NM_004049     | 21.1 | BCL2-related protein A1                                                   | (2)        |
| BEST1                                      | NM_004183     | 3.3  | Bestrophin 1                                                              | (4)        |
| BIRC7                                      | NM_022161     | 10.5 | Baculoviral IAP repeat-containing 7                                       | (5)        |
| CA14                                       | NM_012113     | 4.2  | Carbonic anhydrase XIV                                                    | (2)        |
| CAPN3                                      | NM_000070     | 21.1 | Calpain 3                                                                 | (2)        |
| CDK5R1                                     | NM_003885     | 2.0  | Cyclin-dependent kinase 5, regulatory subunit 1                           | (2)        |
| CHL1                                       | NM_006614     | 2.7  | Cell adhesion molecule with homology to L1CAM                             | (2)        |
| CPEB1                                      | NM_030594     | 2.1  | Cytoplasmic polyadenylation element binding protein 1                     | (2)        |
| CYP27A1                                    | NM_000784     | 5.4  | Cytochrome P450, family 27, subfamily A, polypeptide 1                    | (2)        |
| DCT                                        | NM_001922     | 31.8 | Dopachrome tautomerase                                                    | (6)        |
| DYNC1H1                                    | NM_004411     | 2.6  | Dynein, cytoplasmic 1, intermediate chain 1                               | (2)        |
| FABP7                                      | NM_001446     | 18.6 | Fatty acid binding protein 7, brain                                       | (2)        |
| FRMD4B                                     | NM_015123     | 2.7  | FERM domain containing 4B                                                 | (2)        |
| FXSD3                                      | NM_001136008  | 5.1  | FXSD domain containing ion transport regulator3                           | (2)        |
| GAPDHS                                     | NM_014364     | 3.5  | Glyceraldehyde-3-phosphate dehydrogenase, spermatogenic                   | (2)        |
| GCNT2                                      | NM_001491     | 2.2  | Glucosaminyl (N-acetyl) transferase 2, I-branching enzyme                 | (2)        |
| GNPTAB                                     | NM_024312     | 2.8  | N-acetylglucosamine-1-phosphate transferase a and b                       | (2)        |
| GPM6B                                      | NM_001001995  | 5.3  | Glycoprotein M6B                                                          | (2)        |
| GPNMB                                      | BC011595      | 10.5 | Glycoprotein (transmembrane) nmb                                          | (7)        |
| GPR137B                                    | NM_003272     | 2.9  | G protein-coupled receptor 137B                                           | (2)        |
| GPR143                                     | NM_000273     | 6.0  | G protein-coupled receptor 143 (Oa1)                                      | (8)        |
| GPR56                                      | NM_201525     | 3.8  | G protein-coupled receptor 56                                             | (2)        |
| GREB1                                      | NM_014668     | 2.6  | GREB1 protein                                                             | (2)        |
| HPGD                                       | NM_000860     | 3.8  | Hydroxyprostaglandin dehydrogenase 15-(NAD)                               | (2)        |
| INPP4B                                     | NM_003866     | 1.6  | Inositol polyphosphate-4-phosphatase, type II                             | (2)        |
| IRF4                                       | NM_002460     | 17.1 | Interferon regulatory factor 4                                            | (2)        |
| ITPKB                                      | NM_002221     | 4.5  | Inositol 1,4,5-trisphosphate 3-kinase B                                   | (2)        |
| KCNN2                                      | NM_021614     | 2.8  | Potassium calcium-activated channel N2                                    | (2)        |
| LGALS3                                     | NM_001177388  | 2.8  | Lectin, galactoside-binding, soluble, 3                                   | (2)        |
| LYST                                       | NM_000081     | 6.2  | Lysosomal trafficking regulator                                           | (2)        |
| LZTS1                                      | NM_021020     | 3.9  | Leucine zipper, putative tumor suppressor 1                               | (2)        |
| MBP                                        | NM_001025101  | 6.9  | Myelin basic protein                                                      | (2)        |

|          |                 |       |                                                               |      |
|----------|-----------------|-------|---------------------------------------------------------------|------|
| MDH1     | NM_005917       | 1.8   | Malate dehydrogenase 1, NAD (soluble)                         | (2)  |
| MLANA    | NM_005511       | 376.4 | Melan-A                                                       | (9)  |
| OSTM1    | NM_014028       | 5.3   | Osteopetrosis-associated transmembrane protein 1              | (10) |
| P2RX7    | NM_002562       | 9.4   | Purinergic receptor P2X, ligand-gated ion channel             | (2)  |
| PIR      | NM_003662       | 3.5   | Pirin                                                         | (2)  |
| PLA1A    | NM_015900       | 10.8  | Phospholipase A1 member A                                     | (2)  |
| QDPR     | NM_000320       | 2.7   | Quinoid dihydropteridine reductase                            | (2)  |
| RAB27A   | NM_004580       | 2.3   | RAB27A, member RAS oncogene family                            | (11) |
| RRAGD    | NM_021244       | 4.7   | Ras-related GTP binding D                                     | (2)  |
| RTP4     | NM_022147       | 4.1   | Receptor (chemosensory) transporter protein 4                 | (2)  |
| SCARB1   | NM_005505       | 2.8   | Scavenger receptor class B, member 1                          | (2)  |
| SCUBE2   | NM_020974       | 1.6   | Signal peptide, CUB domain, EGF-like 2                        | (2)  |
| SGCD     | NM_000337       | 2.5   | Sarcoglycan, delta (35kDa dystrophin-associated glycoprotein) | (2)  |
| SIRPA    | NM_001040022    | 4.8   | Signal-regulatory protein alpha                               | (2)  |
| SLC19A2  | NM_006996       | 4.4   | Solute carrier family 19 (thiamine transporter), member 2     | (2)  |
| SLC1A4   | NM_003038       | 2.2   | Solute carrier family 1, member 4                             | (2)  |
| SLC45A2  | ENST00000345083 | 10.9  | Solute carrier family 45, member 2                            | (13) |
| SLC7A8   | NM_182728       | 3.3   | Solute carrier family 7, member 8                             | (2)  |
| SORT1    | NM_002959       | 2.1   | Sortilin 1                                                    | (2)  |
| SPSB1    | NM_025106       | 4.4   | splA/ryanodine receptor domain and SOCS box containing 1      | (2)  |
| ST3GAL6  | NM_006100       | 3.0   | ST3 beta-galactoside alpha-2,3-sialyltransferase 6            | (2)  |
| ST8SIA1  | NM_003034       | 6.7   | ST8 alpha-N-acetyl-neuraminide alpha-2,8-sialyltransferase 1  | (2)  |
| STX7     | NM_003569       | 2.6   | Syntaxin                                                      | (2)  |
| STXBP1   | NM_003165       | 2.5   | Syntaxin binding protein 1                                    | (2)  |
| TBC1D16  | NM_019020       | 2.5   | TBC1 domain family, member 16                                 | (2)  |
| TBX2     | NM_005994       | 7.1   | T-box 2                                                       | (12) |
| TDRD7    | NM_014290       | 1.9   | Tudor domain containing 7                                     | (2)  |
| TIMP2    | NM_003255       | 2.4   | TIMP metallopeptidase inhibitor 2                             | (2)  |
| TMCC2    | NM_014858       | 6.9   | Transmembrane and coiled-coil domain family 2                 | (2)  |
| TMEM51   | NM_001136216    | 2.7   | Transmembrane protein 51                                      | (2)  |
| TNFRSF14 | NM_003820       | 13.7  | Tumor necrosis factor receptor superfamily 14                 | (2)  |
| TRIB2    | ENST00000405331 | 6.4   | Tribbles homolog 2 (Drosophila)                               | (2)  |
| TYR      | NM_000372       | 376.7 | Tyrosinase                                                    | (14) |
| TYRP1    | NM_000550       | 194.9 | Tyrosinase-related protein 1                                  | (15) |
| UBL3     | NM_007106       | 2.6   | Ubiquitin-like 3                                              | (2)  |
| WIPI1    | NM_017983       | 4.9   | WD repeat domain, phosphoinositide interacting 1              | (2)  |

#### genes up-regulated in monolayers

|       |           |     |                                          |     |
|-------|-----------|-----|------------------------------------------|-----|
| ITGA4 | NM_000885 | 3.4 | Integrin 4A                              | (2) |
| MTHFS | NM_006441 | 1.7 | 5,10-methenyltetrahydrofolate synthetase | (2) |
| RGS20 | NM_170587 | 2.6 | Regulator of G-protein signaling 20      | (2) |
| TMC6  | NM_007267 | 2.9 | Transmembrane channel-like 6             | (2) |

---

## References to Table S5

1. Luchin A, Purdom G, Murphy K, Clark MY, Angel N, et al. (2000) The microphthalmia transcription factor regulates expression of the tartrate-resistant acid phosphatase gene during terminal differentiation of osteoclasts. *J Bone Miner Res* 15: 451-460.
2. Hoek KS, Schlegel NC, Eichhoff OM, Widmer DS, Praetorius C, et al. (2008) Novel MITF targets identified using a two-step DNA microarray strategy. *Pigment Cell Melanoma Res* 21: 665-676.
3. McGill GG, Horstmann M, Widlund HR, Du J, Motyckova G, et al. (2002) Bcl2 regulation by the melanocyte master regulator Mitf modulates lineage survival and melanoma cell viability. *Cell* 109: 707-718.
4. Esumi N, Kachi S, Campochiaro PA, Zack DJ (2007) VMD2 promoter requires two proximal E-box sites for its activity in vivo and is regulated by the MITF-TFE family. *J Biol Chem* 282: 1838-1850.
5. Dynek JN, Chan SM, Liu J, Zha J, Fairbrother WJ, et al. (2008) Microphthalmia-associated transcription factor is a critical transcriptional regulator of melanoma inhibitor of apoptosis in melanomas. *Cancer Res* 68: 3124-3132.
6. Yasumoto K, Takeda K, Saito H, Watanabe K, Takahashi K, et al. (2002) Microphthalmia-associated transcription factor interacts with LEF-1, a mediator of Wnt signaling. *EMBO J* 21: 2703-2714.
7. Loftus SK, Antonellis A, Matera I, Renaud G, Baxter LL, et al. (2009) Gpnmb is a melanoblast-expressed, MITF-dependent gene. *Pigment Cell Melanoma Res* 22: 99-110.
8. Vetrini F, Auricchio A, Du J, Angeletti B, Fisher DE, et al. (2004) The microphthalmia transcription factor (Mitf) controls expression of the ocular albinism type 1 gene: link between melanin synthesis and melanosome biogenesis. *Mol Cell Biol* 24: 6550-6559.
9. Du J, Miller AJ, Widlund HR, Horstmann MA, Ramaswamy S, et al. (2003) MLANA/MART1 and SILV/PMEL17/GP100 are transcriptionally regulated by MITF in melanocytes and melanoma. *Am J Pathol* 163: 333-343.
10. Meadows NA, Sharma SM, Faulkner GJ, Ostrowski MC, Hume DA, et al. (2007) The expression of Clcn7 and Ostm1 in osteoclasts is coregulated by microphthalmia transcription factor. *J Biol Chem* 282: 1891-1904.
11. Chiaverini C, Beuret L, Flori E, Busca R, Abbe P, et al. (2008) Microphthalmia-associated transcription factor regulates RAB27A gene expression and controls melanosome transport. *J Biol Chem* 283: 12635-12642.
12. Carreira S, Liu B, Goding CR (2000) The gene encoding the T-box factor Tbx2 is a target for the microphthalmia-associated transcription factor in melanocytes. *J Biol Chem* 275: 21920-21927.
13. Du J, Fisher DE (2002) Identification of Aim-1 as the underwhite mouse mutant and its transcriptional regulation by MITF. *J Biol Chem* 277: 402-406.
14. Hou L, Panthier JJ, Arnheiter H (2000) Signaling and transcriptional regulation in the neural crest-derived melanocyte lineage: interactions between KIT and MITF. *Development* 127: 5379-5389.
15. Fang D, Tsuji Y, Setaluri V (2002) Selective down-regulation of tyrosinase family gene TYRP1 by inhibition of the activity of melanocyte transcription factor, MITF. *Nucleic Acids Res* 30: 3096-3106.

**Table S6.** Melan-A/MART-1 and gp100 were expressed in melanospheres at higher percentages of cells than in monolayers.

|                       | melanospheres |       |        | monolayers |       |        |
|-----------------------|---------------|-------|--------|------------|-------|--------|
|                       | DMBC2         | DMBC8 | DMBC10 | DMBC2      | DMBC8 | DMBC10 |
| Melan A/MART          | 81-82         | 36-80 | 47-95  | 3-35       | 4-20  | 10-12  |
| gp100 ( <i>PMEL</i> ) | 31-88         | 33-49 | 66-90  | 8-22       | 28-44 | 7-39   |

The frequencies of Melan A/MART-1- and gp100-positive melanoma cells were assessed by flow cytometry in freshly dissociated melanospheres cultured in SCM and in monolayers maintained in the presence of 5% FBS.
